# Supplementary material
Source: publisher figshare collection journal article supplement (https://acs.figshare.com/ndownloader/files/11756003)

## Supporting Information

### **Ba<sub>3</sub>Fe<sub>1.56</sub>Ir<sub>1.44</sub>O<sub>9</sub>: A Polar Semiconducting Triple Perovskite with Near Room Temperature Magnetic Ordering**

Timothy Ferreira<sup>1</sup>, Darren Carone<sup>1</sup>, Amanda Huon<sup>2</sup>, Andreas Herklotz<sup>3</sup>, Sebastian A. Stoian,<sup>4</sup> Steve M. Heald<sup>5</sup>, Gregory Morrison<sup>1</sup>, Mark D. Smith<sup>1</sup>, Hans-Conrad zur Loye<sup>1\*</sup>

<sup>1</sup>Department of Chemistry and Biochemistry, University of South Carolina, Columbia, SC 29208

<sup>2</sup> Department of Materials Science and Engineering, Drexel University, Philadelphia, PA 19104

<sup>3</sup> Institute for Physics, Martin-Luther University Halle-Wittenberg, Halle, Germany, 06120

<sup>4</sup>Department of Chemistry, University of Idaho, Moscow, ID 83844

<sup>5</sup>X-ray Science Division, Advanced Photon Source, Argonne National Laboratory, Argonne IL 60439

\* Corresponding author.

Hans-Conrad zur Loye

Email: [zurloye@mailbox.sc.edu](mailto:zurloye@mailbox.sc.edu)

Phone: (803) 777-6916

Fax: (803) 777-8508

**Figure S1.** The natural logarithm of electrical resistance plotted against  $T^{-4}$  to test for three dimensional Mott variable range hopping. The significant deviation from a linear relationship between these values indicates that Mott variable range hopping is not the conduction mechanism.

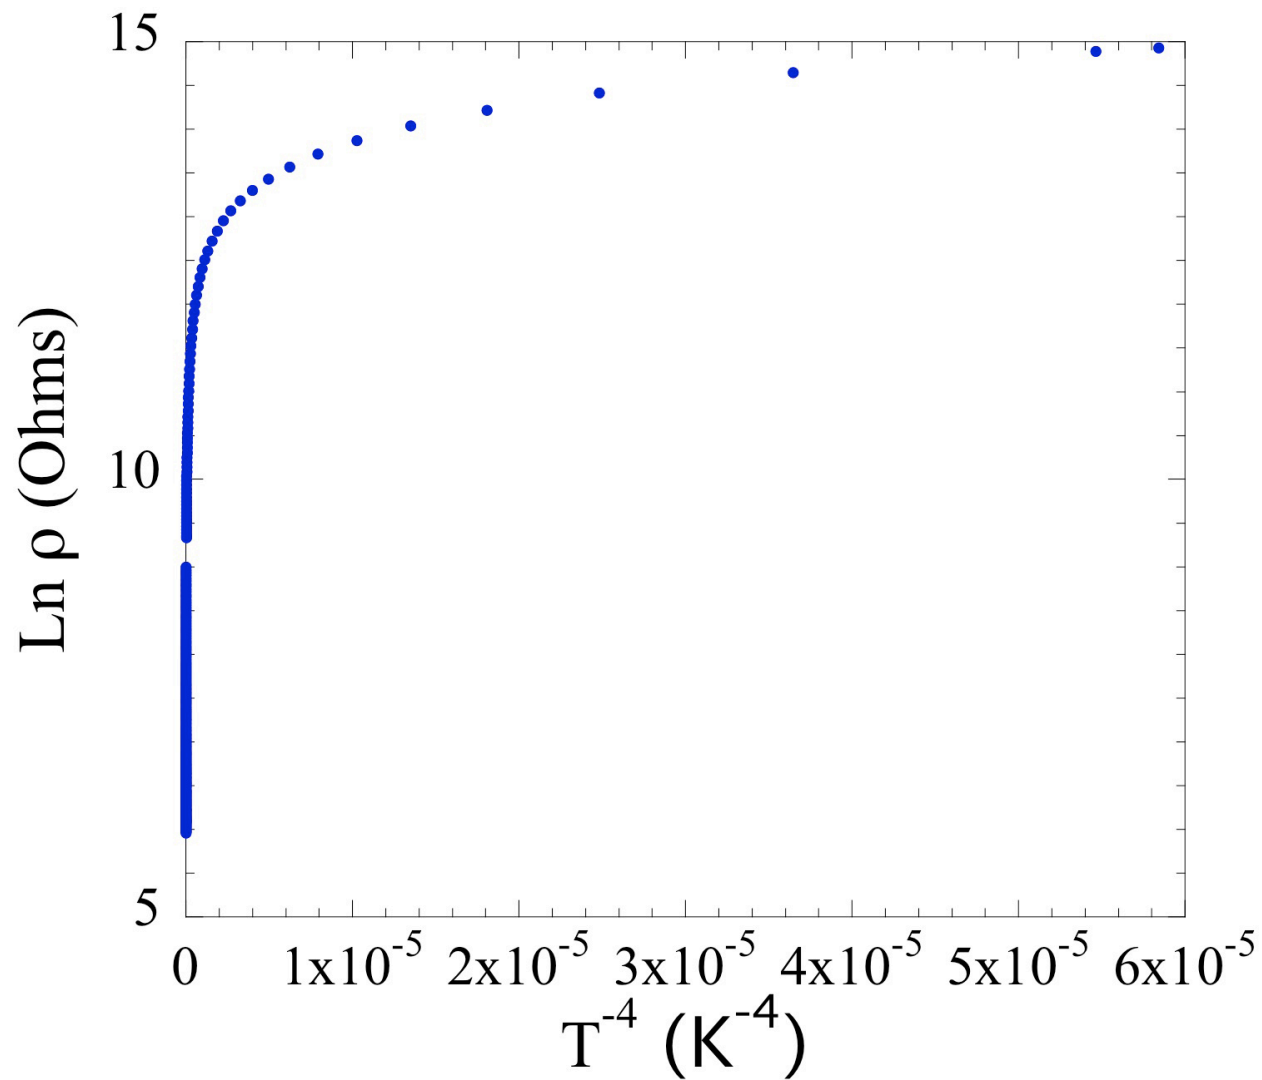

**Figure S2.** Powder X-ray diffraction of  $\text{Ba}_3\text{Fe}_{1.56}\text{Ir}_{1.44}\text{O}_9$ , shown in blue, overlaid with the simulated powder pattern based on CIF data, shown in green.

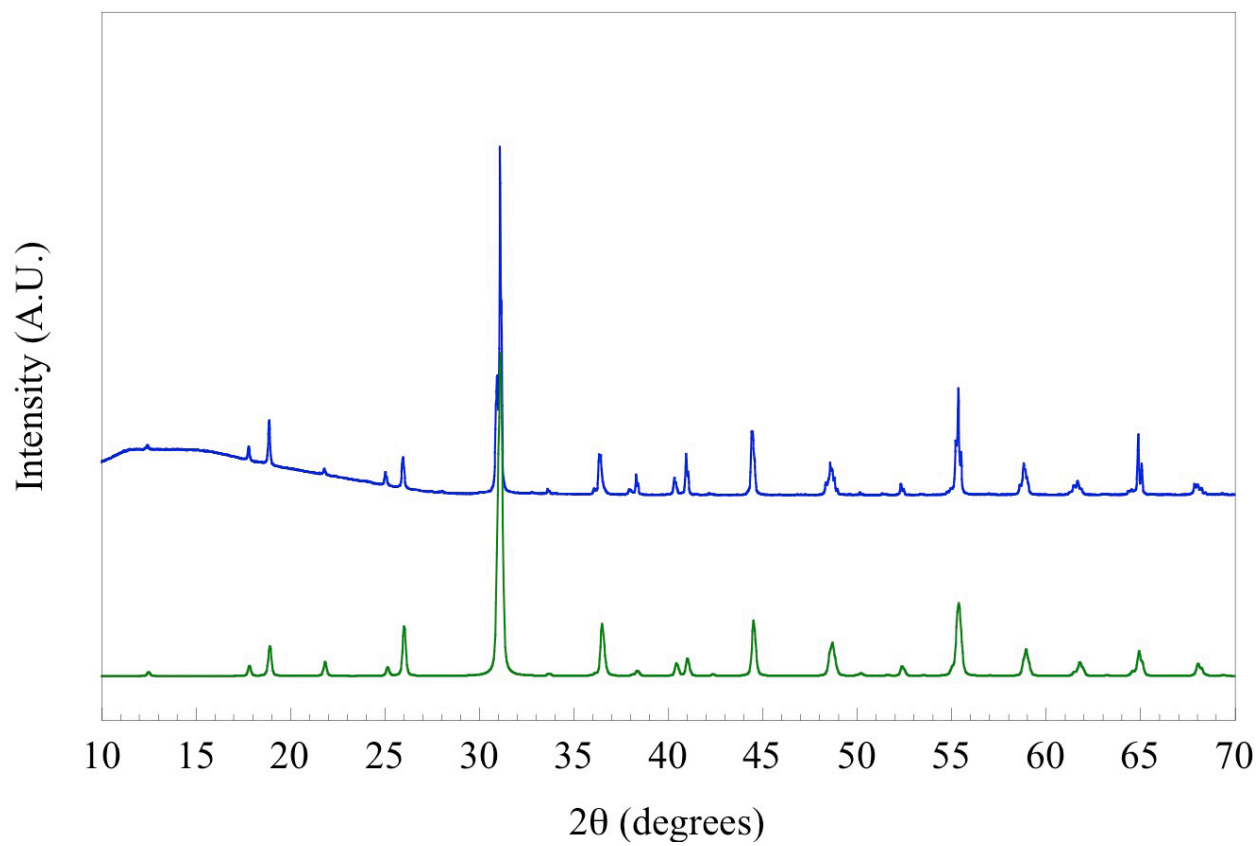

**Figure S3.** Inverse of the temperature dependence of the magnetic susceptibility of  $\text{Ba}_3\text{Fe}_{1.56}\text{Ir}_{1.44}\text{O}_9$  at an applied field of 0.1 T fit in the Curie-Weiss regime to extract an effective moment and Weiss temperature.

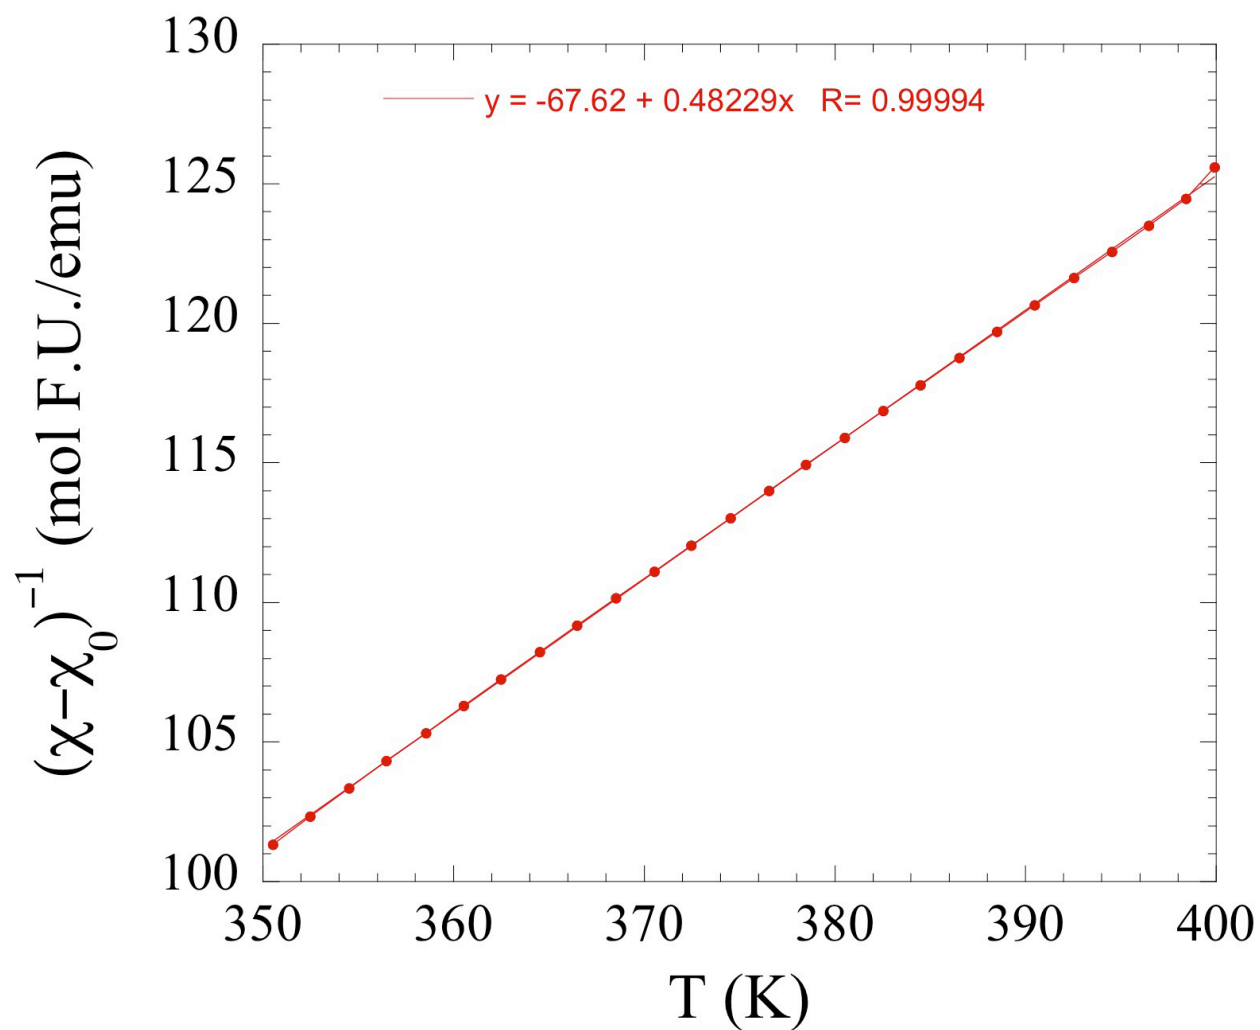

**Figure S4.** Temperature dependence of  $\chi_m T$  for  $\text{Ba}_3\text{Fe}_{1.56}\text{Ir}_{1.44}\text{O}_9$  under an applied field of 0.1 T. For purely antiferromagnetic interactions, a gradual decrease of magnetic susceptibility is expected for decreasing temperatures. This data is indicative of ferromagnetic-like interactions, with an observed magnetic moment of  $5.20 \mu_B$  at 400 K.

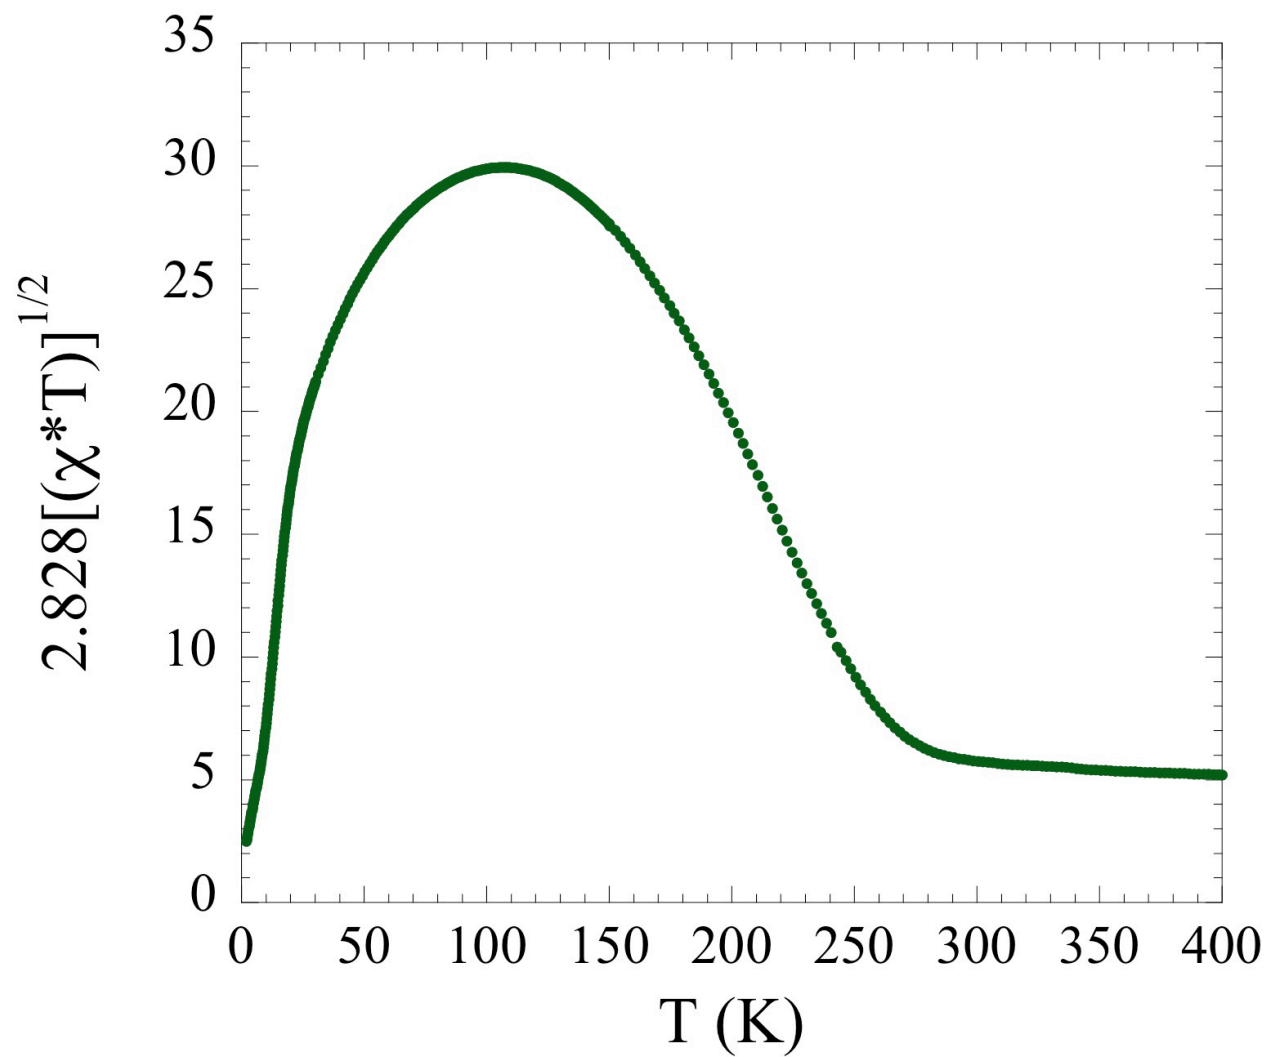

**Figure S5.** Temperature dependence of the magnetic susceptibility for  $\text{Ba}_3\text{Fe}_{1.56}\text{Ir}_{1.44}\text{O}_9$  under an applied field of 1 T, with FC data shown in blue, ZFC data shown in green, and inverse susceptibility data shown in red.

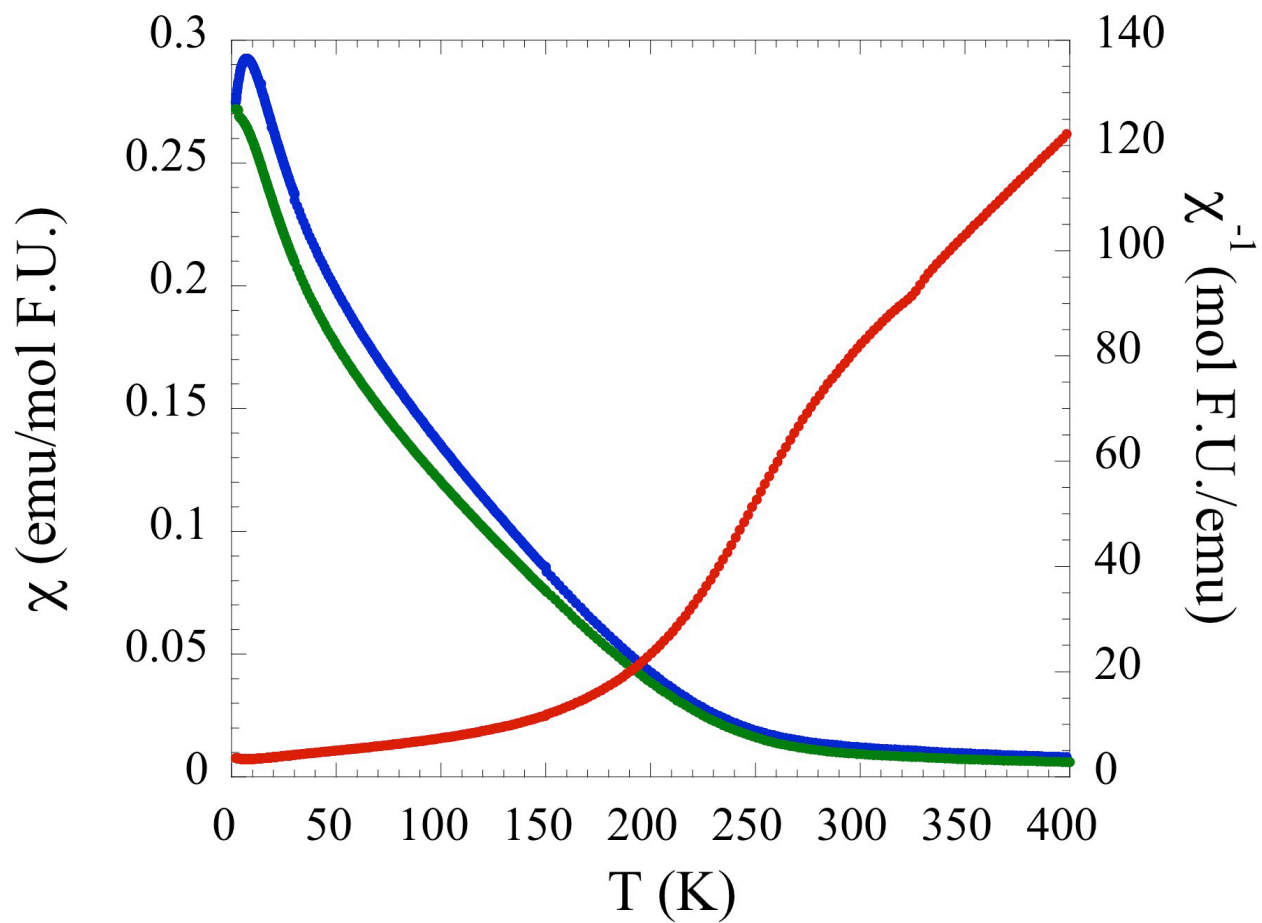

**Figure S6.** Magnetization ( $\mu_B$ ) versus magnetic field (T) for  $\text{Ba}_3\text{Fe}_{1.56}\text{Ir}_{1.44}\text{O}_9$  ranging from 0 to 5 T at 2 K. A weak coercive force of 0.01 T can be observed in the hysteresis loop inset.

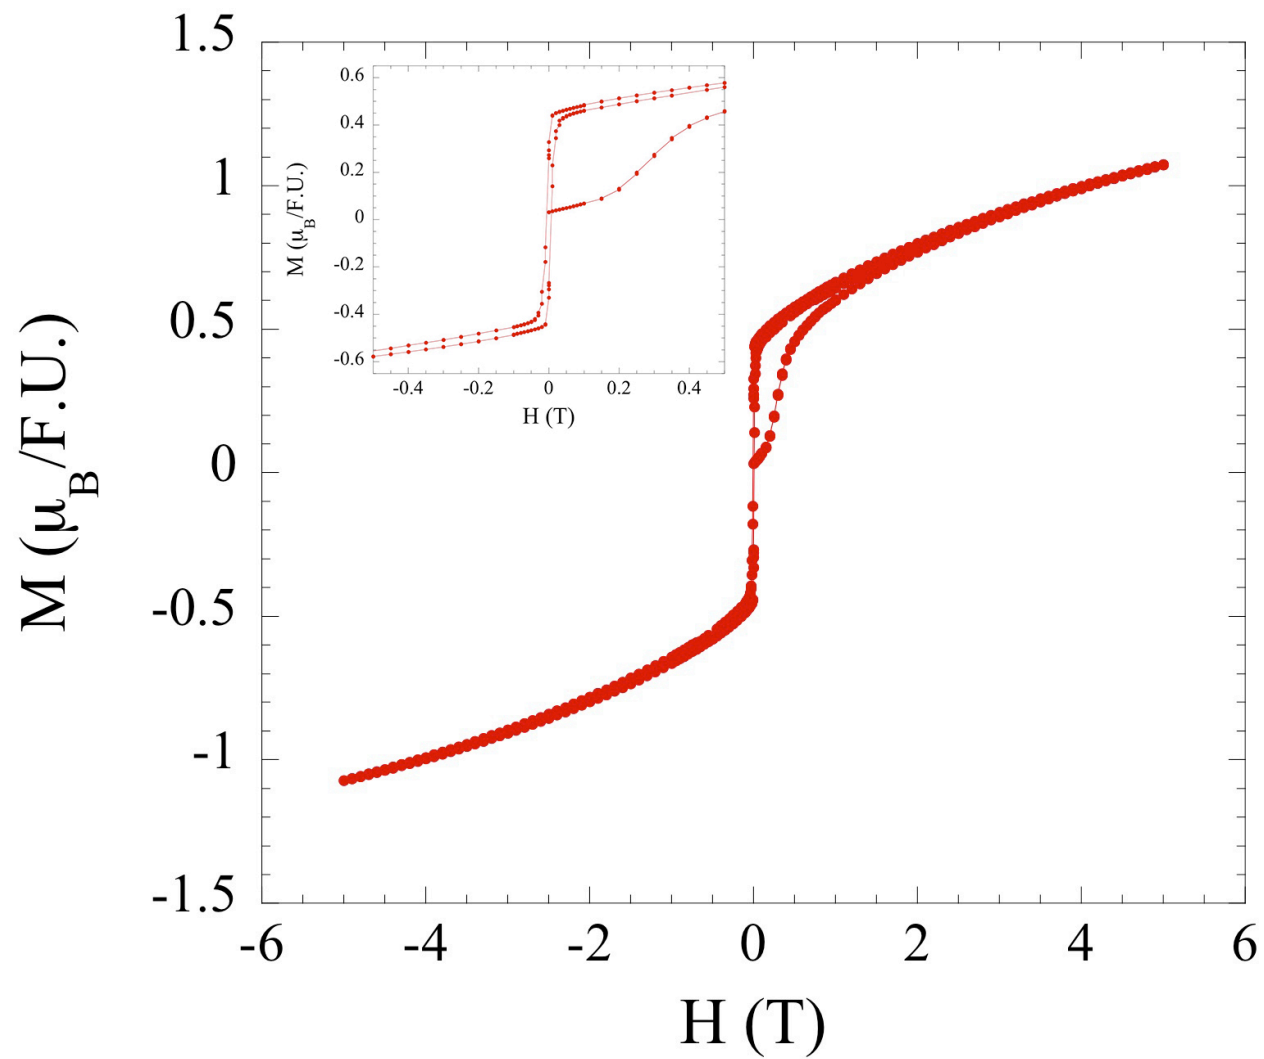

**Figure S7.** Magnetization ( $\mu_B$ ) versus magnetic field (T) for  $\text{Ba}_3\text{Fe}_{1.56}\text{Ir}_{1.44}\text{O}_9$  ranging from 0 to 5 T at 45 K. A weak coercive force of 0.01 T can be observed in the hysteresis loop inset.

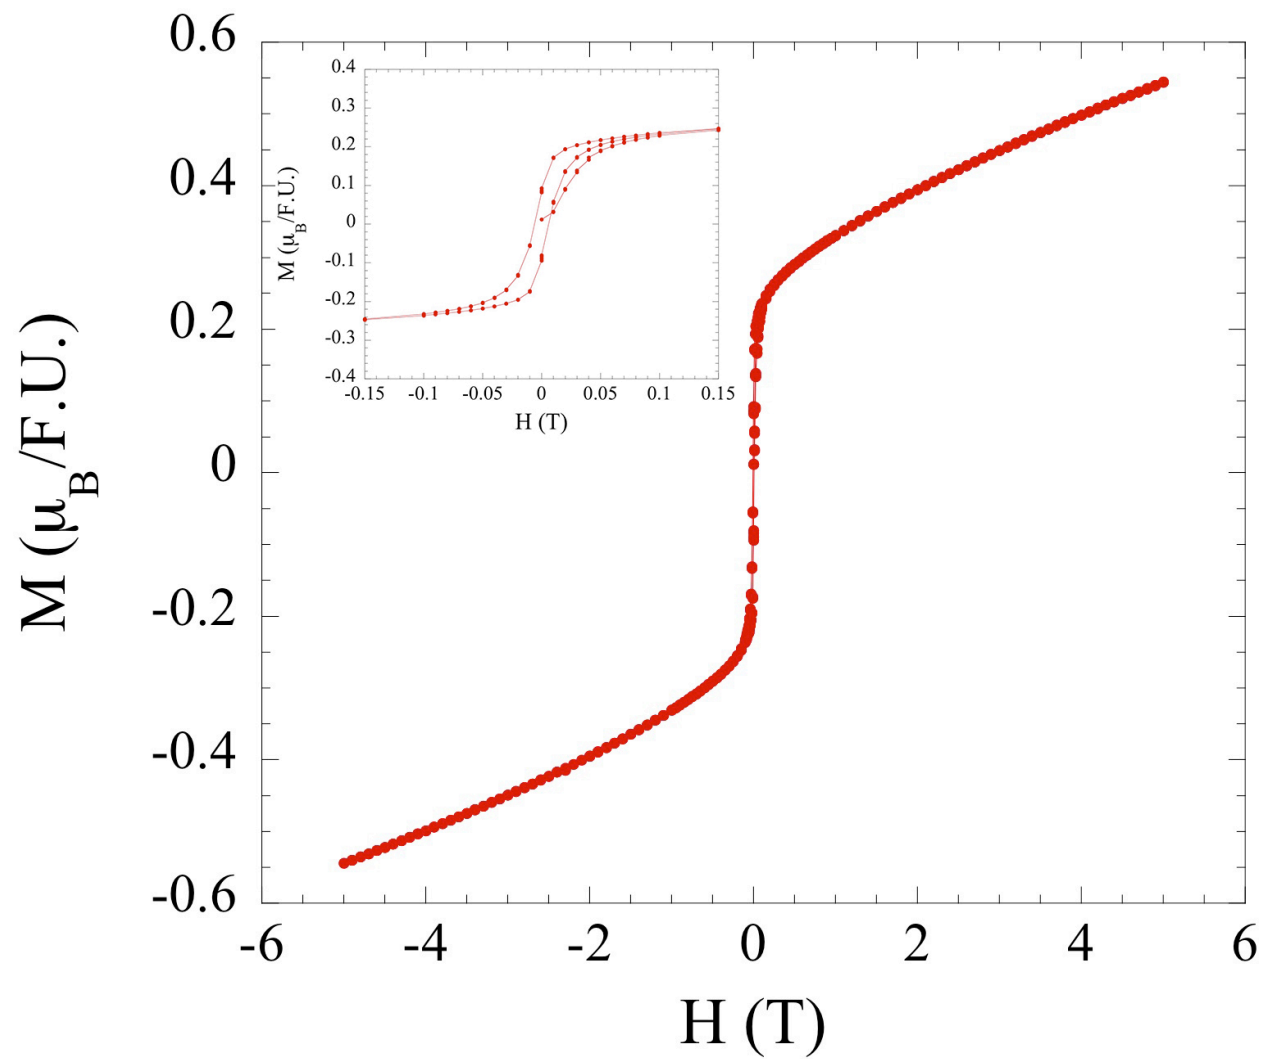

Supplement: Supplementary file 1 [file 11756003]
